# Supplementary material
Source: PubMed Central journal article supplement (PMC4452030)

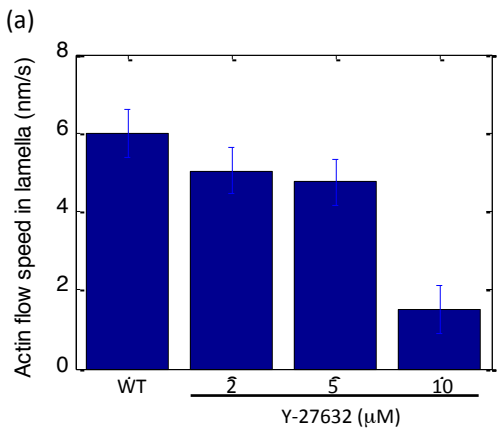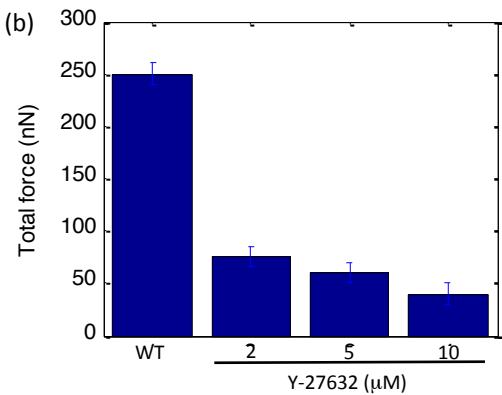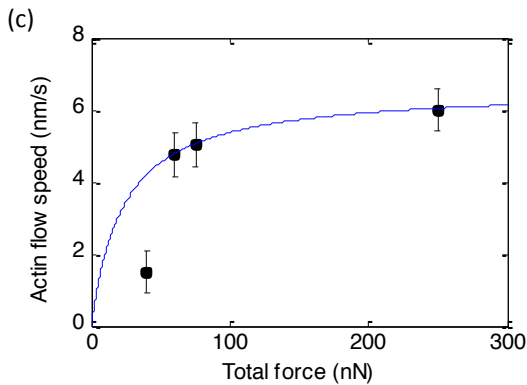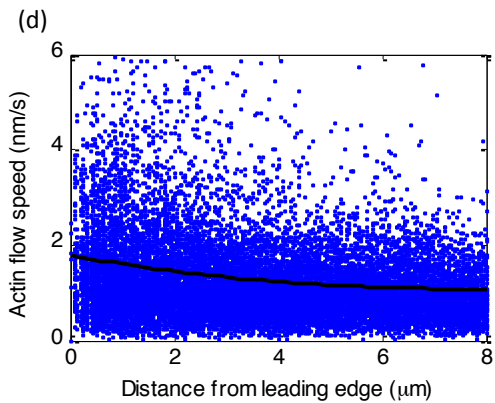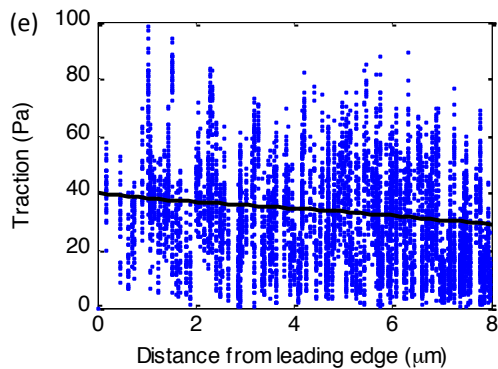

Supplement: NIHMS692557-supplement-PB035002_suppdata1_pdf.pdf [file NIHMS692557-supplement-PB035002_suppdata1_pdf.pdf]

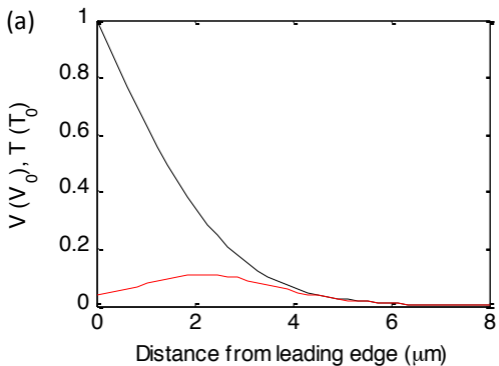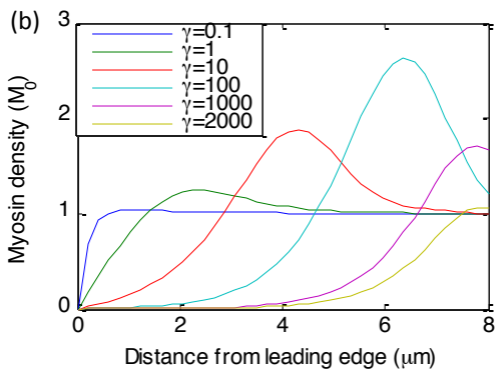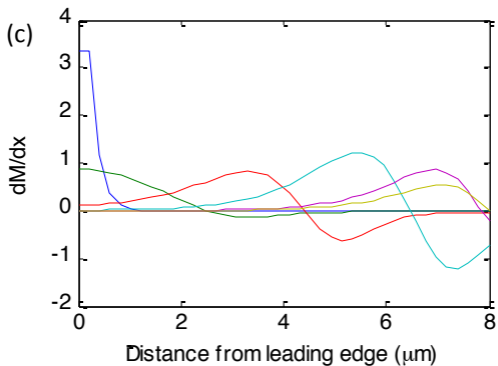

Supplement: NIHMS692557-supplement-PB035002_suppdata3_pdf.pdf [file NIHMS692557-supplement-PB035002_suppdata3_pdf.pdf]

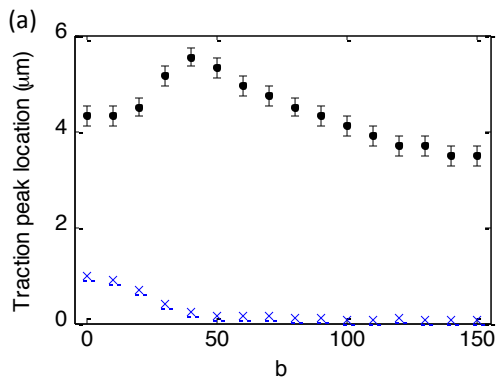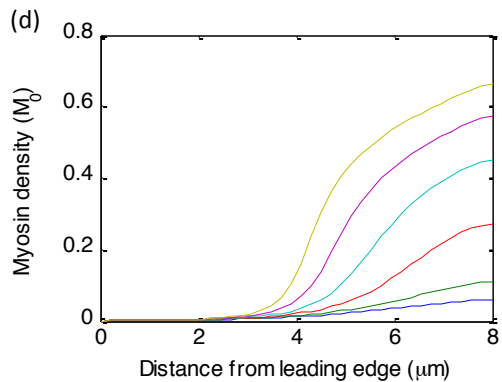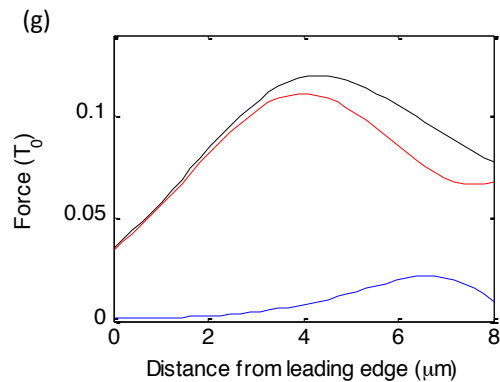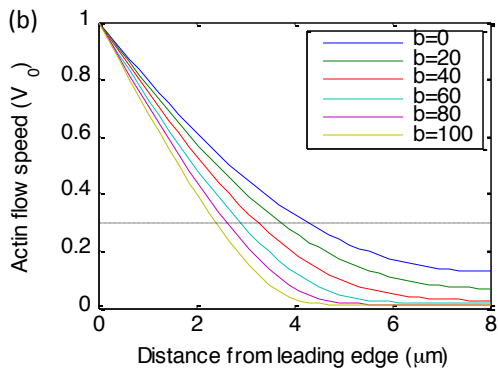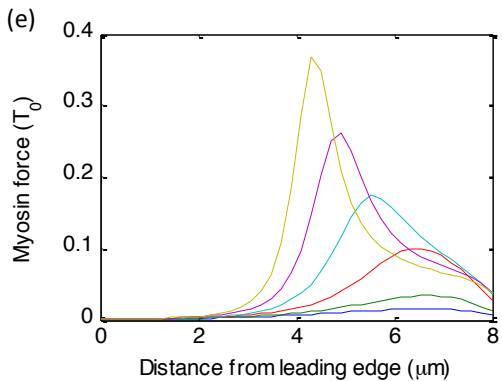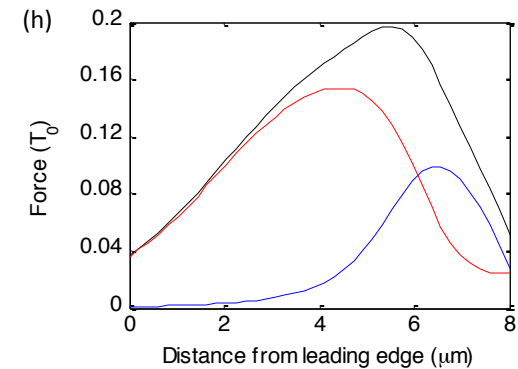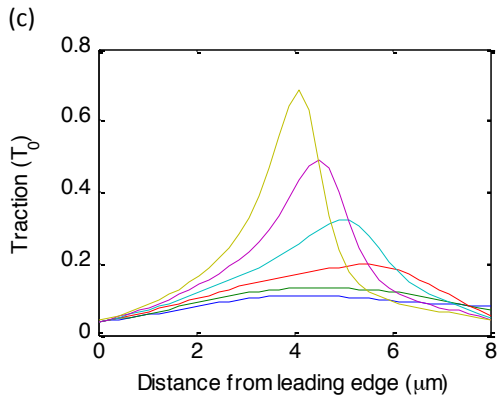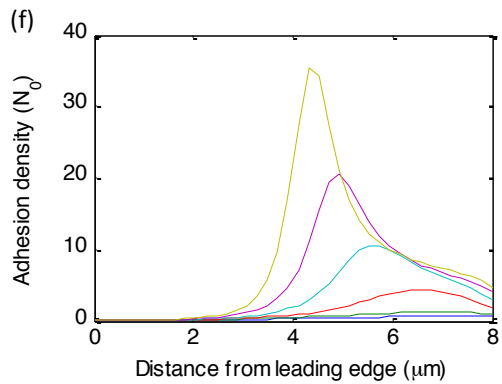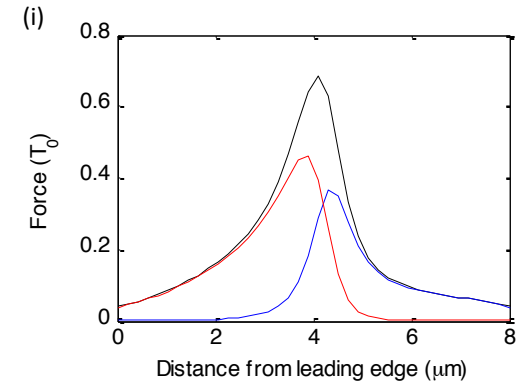

Supplement: NIHMS692557-supplement-PB035002_suppdata4_pdf.pdf [file NIHMS692557-supplement-PB035002_suppdata4_pdf.pdf]

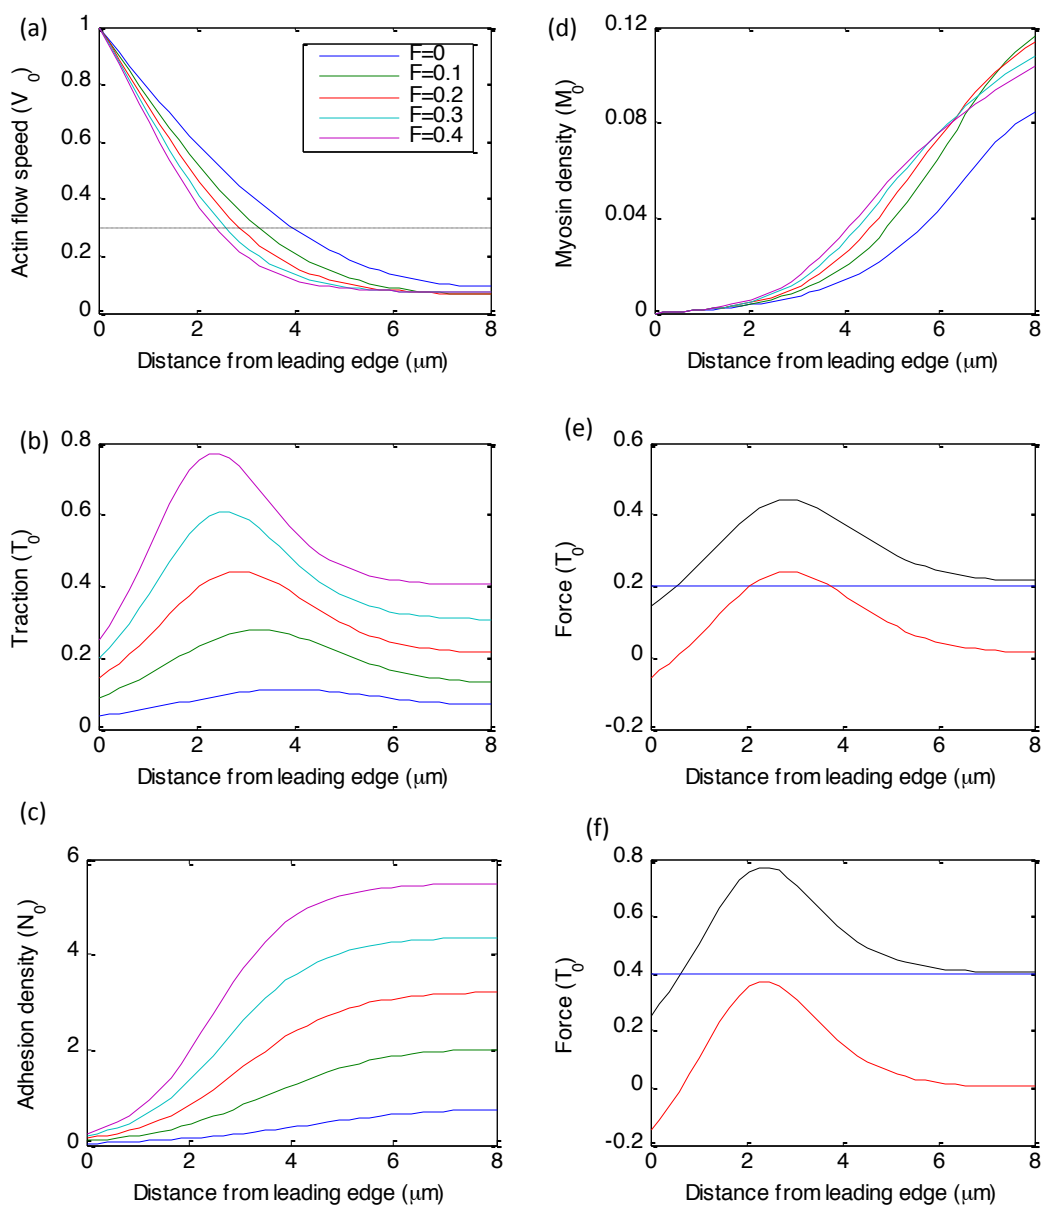

Supplement: NIHMS692557-supplement-PB035002_suppdata5_pdf.pdf [file NIHMS692557-supplement-PB035002_suppdata5_pdf.pdf]

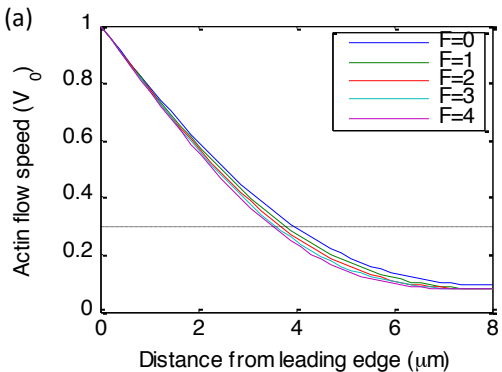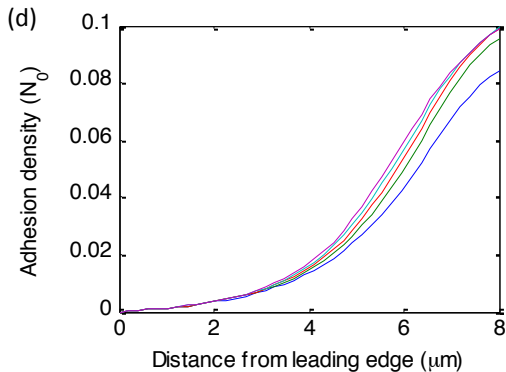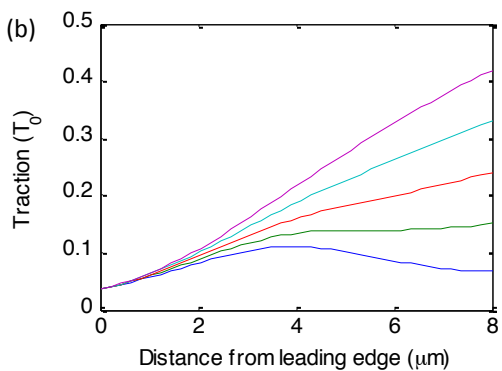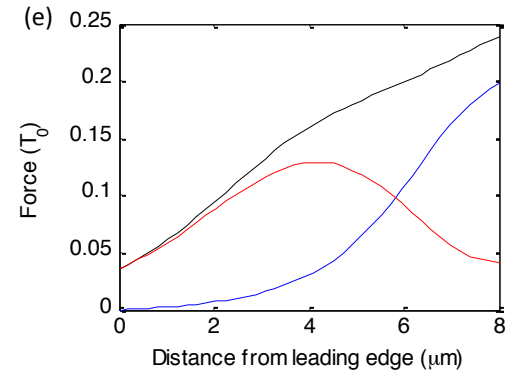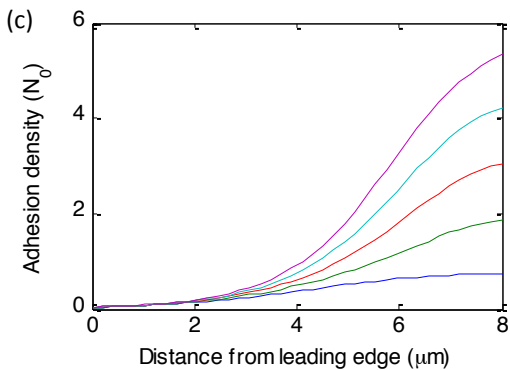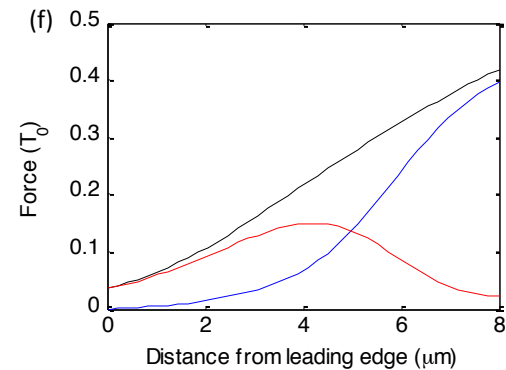

Supplement: NIHMS692557-supplement-PB035002_suppdata7_pdf.pdf [file NIHMS692557-supplement-PB035002_suppdata7_pdf.pdf]
